# Supplementary material
Source: MDPI journal article supplement (https://www.mdpi.com/2071-1050/15/4/3081)
Supplement: s1 [file s1]

## Supplementary Materials

### S1. Inverse distance weighting method

The generic equation for inverse distance weighted interpolation is

$$u(X) = \frac{\sum_{i=0}^N \frac{w_i(X)u_i}{\sum_{j=0}^N w_j(X)}} \quad (S1)$$

Where

$$w_i(X) = \frac{1}{d(X, X_i)^p}$$

$X$  : The estimation value.

$X_i$  : The sample value in point i.

$d$  : The distance of the sample point to the estimated point.

$N$  : The total number of predictions for each validation case.

$p$  : The distance coefficient that is an exponent defined by the user

**Tables:**

Table. S1. The mixing ratio of fresh-groundwater to saline-groundwater in each region

| Area    |          | Mixing ratio(%) |
|---------|----------|-----------------|
| East    | Gujwa    | 5.6             |
|         | Seongsan | 15.5            |
|         | Pyoseon  | 11.0            |
| West    | Daejeong | 34.8            |
|         | Hankyung | 51.7            |
|         | Hallim   | 17.5            |
| Average |          | 13.4            |

Table S2. Spearman's  $\rho$  correlation analysis between electrical conductivity and TDS

| Spearman's $\rho$ |       |
|-------------------|-------|
|                   | TDS   |
| EC                | 0.70* |

\*:  $p < 0.05$

Figures:

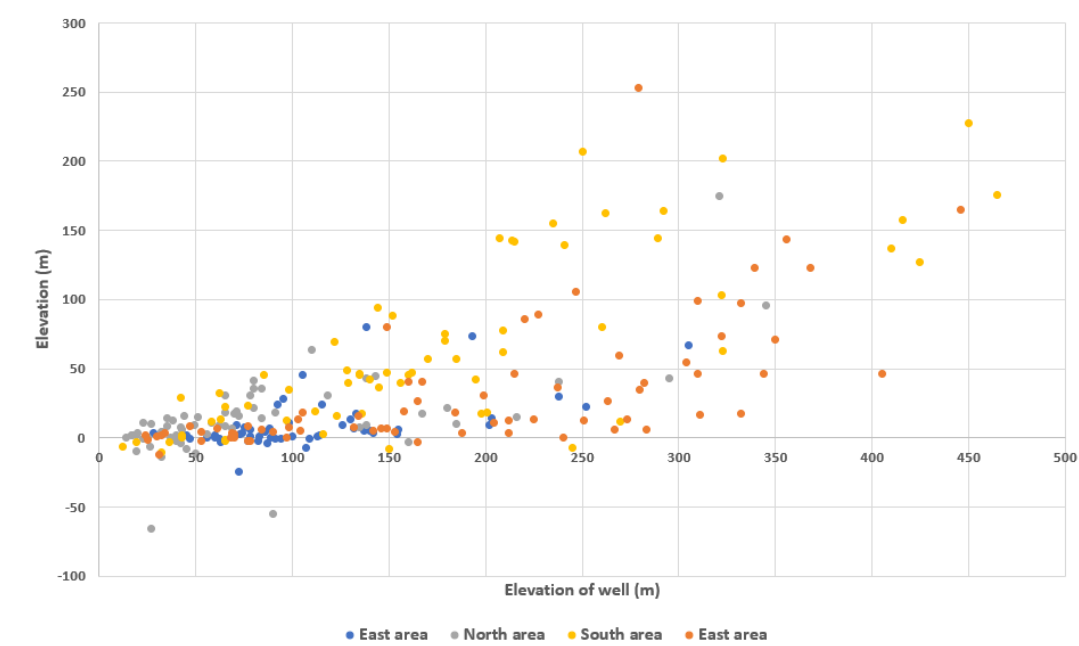

Figure S1. Plots of groundwater level according to the elevation of well in each region of Jeju island (data from MOE and K-water, 2018)

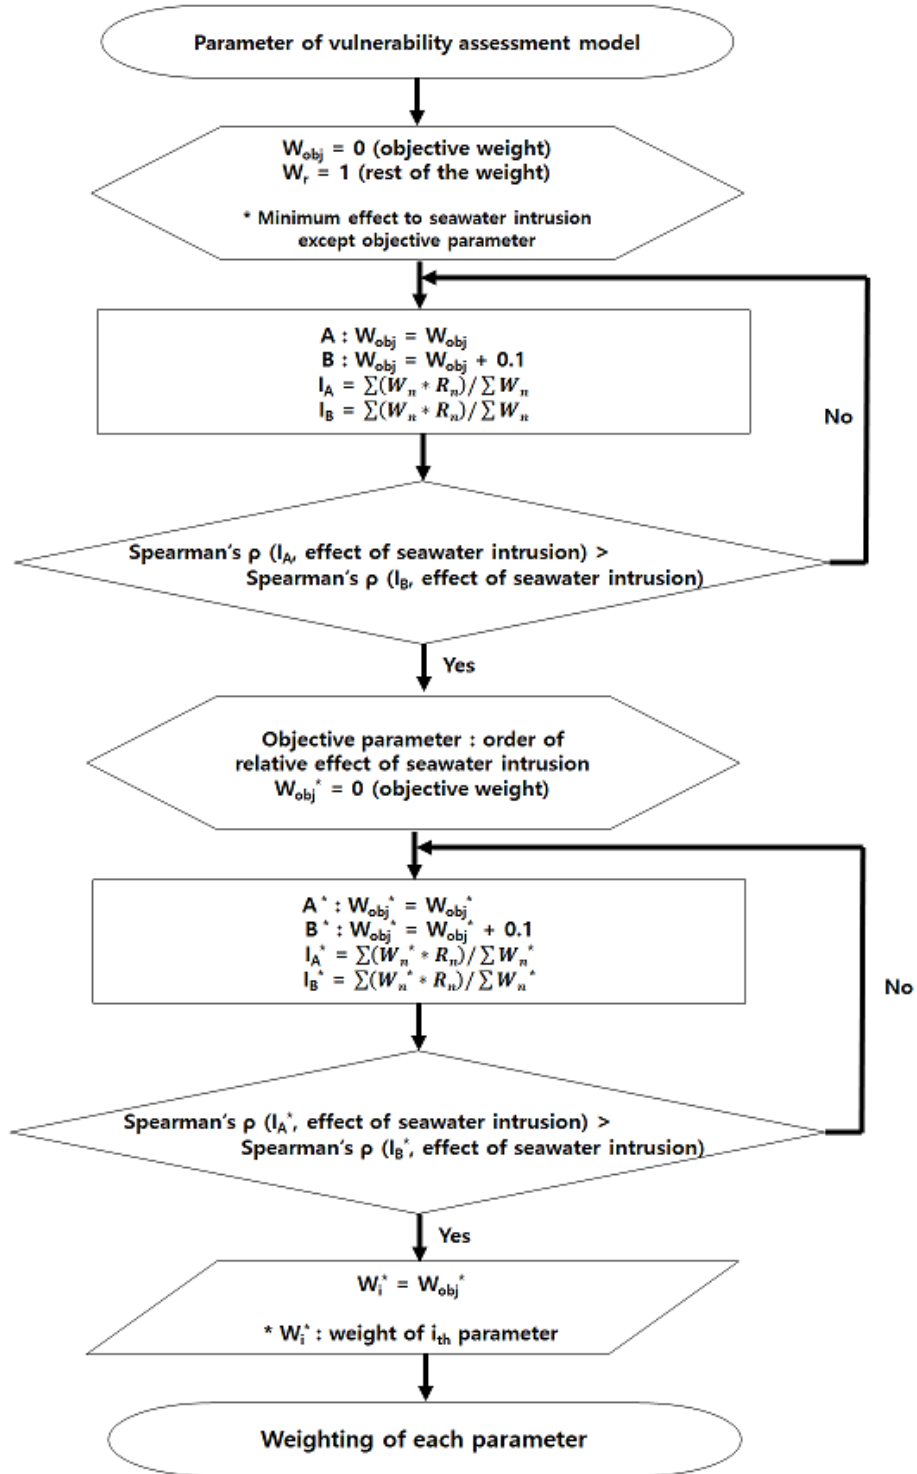

Figure S2. Flow chart of the weight optimization method

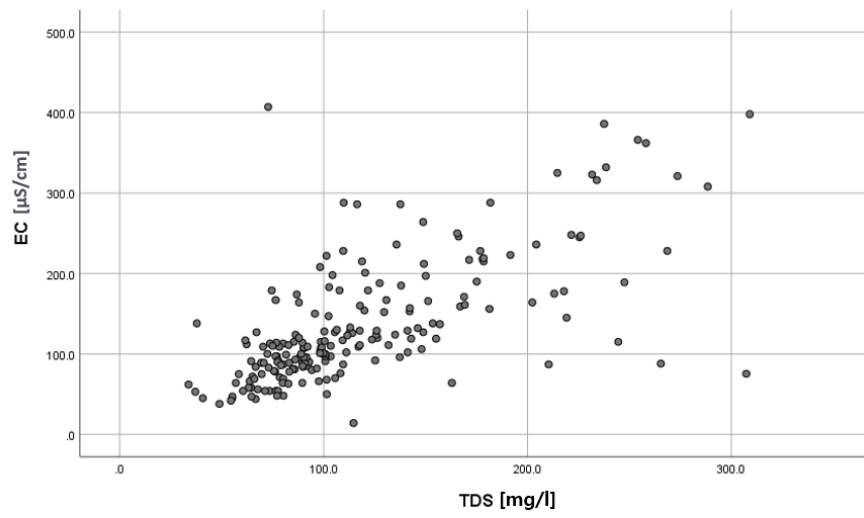

Figures S3. Correlation plots of the total dissolved solids against electrical conductivities of groundwater
